# Supplementary material for: Toward a new type of proton conductor based on imidazole and aromatic acids
Source: Royal Society of Chemistry journal article supplement (doi:10.1039/c9cp01888c), 2019-01-01
Supplement: c9cp01888c1.pdf [file c9cp01888c1.pdf]

## Supplementary Materials

### Toward a new type of proton conductors based on imidazole and aromatic acids

Sylwia Zięba, Alina T. Dubis, Andrzej K. Gzella, Paweł Ławniczak,  
Katarzyna Pogorzelec-Glaser, Andrzej Łapiński

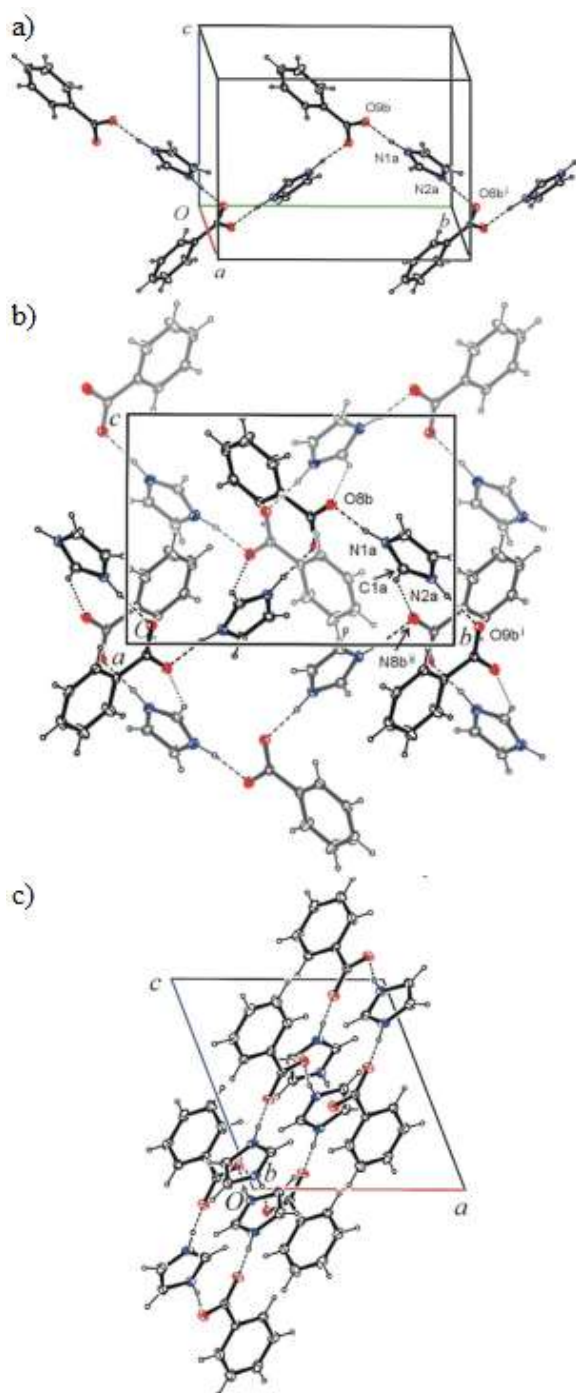

**Figure S1.** Part of the molecular packing of **1** in two views, showing the hydrogen-bonded (a) chain of molecules growing parallel to the *b* axis, (b,c) sheet of molecules parallel to the (-101) plane. The symmetry codes are explained in **Table 1S**.

**Table S1.** The geometrical parameters of D-H...A interactions for salt **1** (Å, °).

| <i>D</i> —H... <i>A</i>          | <i>D</i> —H | H... <i>A</i> | <i>D</i> ... <i>A</i> | <i>D</i> —H... <i>A</i> |
|----------------------------------|-------------|---------------|-----------------------|-------------------------|
| N1a—H1ab...O9b                   | 0.94(2)     | 1.67(2)       | 2.6033(14)            | 168.4(16)               |
| N2a—H2a...O8b <sup>i</sup>       | 0.922(18)   | 1.730(18)     | 2.6495(14)            | 174.6(18)               |
| C1a—H1aa...O9b <sup>ii</sup>     | 0.95        | 2.38          | 3.2032(17)            | 145                     |
| C2a—H2aa...π(Ph <sup>iii</sup> ) | 0.95        | 2.66          | 3.5531(16)            | 156                     |

Symmetry codes: (i) 1/2-x,1/2+y,1/2-z; (ii) -1/2+x,3/2-y,-1/2+z; (iii) 1/2+x,3/2-y,-1/2+z

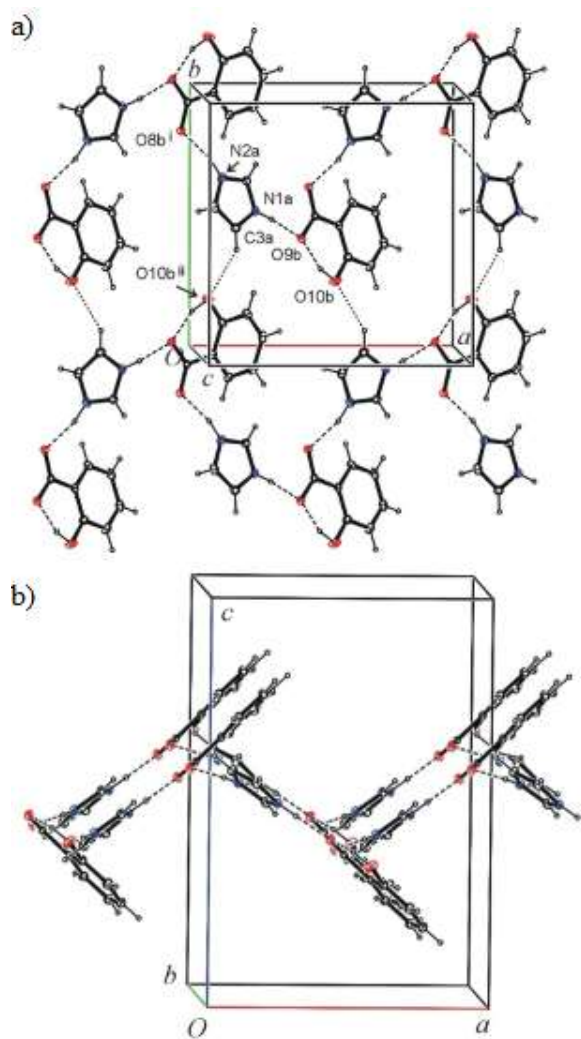

**Figure S2.** Two views of the unit cell of **2** showing the hydrogen-bonded sheet of molecules parallel to the *ab* plane. The symmetry codes are explained in **Table 2S**.

**Table S2.** The geometrical parameters of D-H...A interactions for salt **2** (Å, °).

| <i>D</i> —H... <i>A</i>         | <i>D</i> —H | H... <i>A</i> | <i>D</i> ... <i>A</i> | <i>D</i> —H... <i>A</i> |
|---------------------------------|-------------|---------------|-----------------------|-------------------------|
| O10b—H10b...O9b                 | 0.96(2)     | 1.62(2)       | 2.5285(14)            | 156(2)                  |
| N1a—H1a...O9b                   | 0.93(2)     | 1.77(2)       | 2.6950(15)            | 173(2)                  |
| N2a—H2a...O8b <sup>i</sup>      | 0.93(2)     | 1.77(2)       | 2.6798(15)            | 166(2)                  |
| C3a—H3aa...O10b <sup>ii</sup>   | 0.95        | 2.42          | 3.2537(18)            | 147                     |
| C3a—H3aa...πPh <sup>iii</sup> ) | 0.95        | 2.69          | 3.5777(16)            | 156                     |

Symmetry codes: (i)  $-1/2+x, 3/2-y, 1-z$ ; (ii)  $-1/2+x, 1/2-y, 1-z$ ; (iii)  $1/2-x, 1-y, 1/2+z$

a)

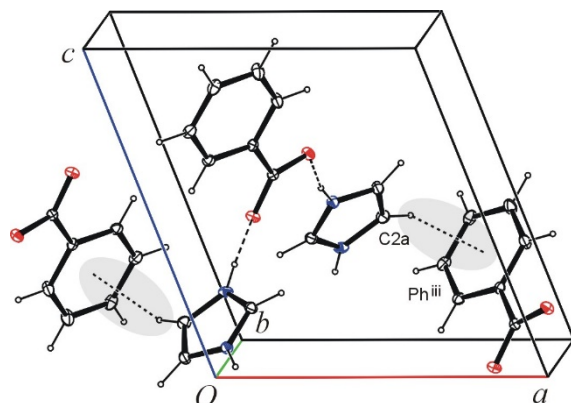

b)

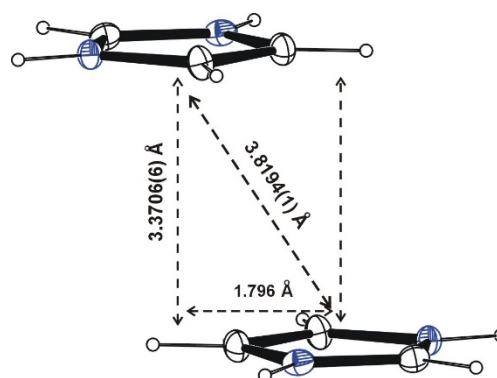

**Figure S3.** Intermolecular contacts: C2a-H2aa... $\pi$ (Ph<sup>iii</sup>) (a) and  $\pi$ (Im) $\cdots\pi$ (Im<sup>iv</sup>) (b); symmetry codes (iii)  $1/2+x, 3/2-y, -1/2+z$ ; (iv)  $1-x, 2-y, 1-z$ ; Ph and Im = phenyl and imidazolium rings.

*a)*

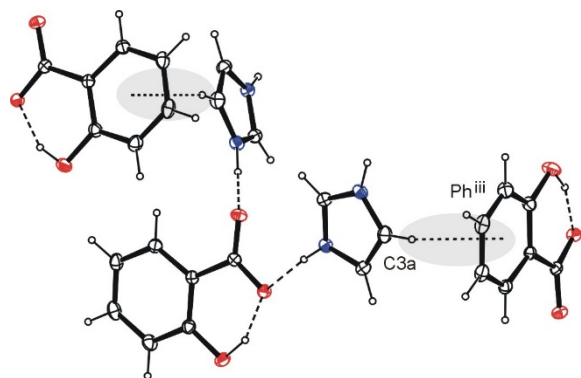

*b)*

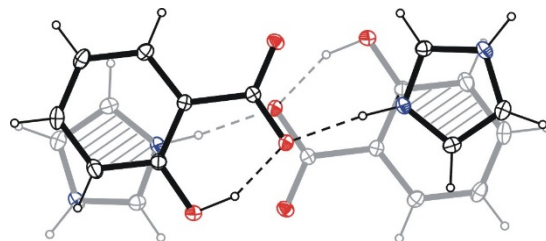

**Figure S4.** Intermolecular contacts of type C-H... $\pi$ (Ph) (a) and of type  $\pi$ ... $\pi$  (b).

**Table S3.** NMR data interpretation. Note: The numbering of carbon and nitrogen atoms of imidazole and acids molecules are given in **Figure S5**.

|                 | <b>Imidazole</b> | <b>Benzoic acid</b> | <b>Salt 1</b> |                 | <b>Salicylic acid</b> | <b>Salt 2</b> |
|-----------------|------------------|---------------------|---------------|-----------------|-----------------------|---------------|
|                 |                  |                     |               | <b>C3b (d)</b>  | 6.95                  | 6.78          |
| <b>C2a, C3a</b> | 7.02             |                     | 7.09          | <b>C2a, C3a</b> |                       | 7.55          |
| <b>C3b, C5b</b> |                  | 7.49                | 7.47          | <b>C4b (t)</b>  | 7.51                  | 7.85          |
| <b>C4b</b>      |                  | 7.61                | 7.81          | <b>C5b (t)</b>  | 6.93                  | 6.76          |
| <b>C1a</b>      | 7.66             |                     | 7.58          |                 |                       | 8.82          |
| <b>C2b, C6b</b> |                  | 7.95                | 7.95          | <b>C6b (d)</b>  | 7.79                  | 7.30          |
| <b>N1a, N2a</b> | 12.1             |                     | 10.98         |                 |                       | 14.01         |
| <b>COOH</b>     |                  | 12.95               |               | <b>COOH</b>     | 13.30                 | 14.01         |
|                 |                  |                     |               | <b>OH</b>       | 11.46                 |               |
|                 |                  |                     |               | <b>C3b</b>      | 117.11                | 116.37        |
|                 |                  |                     |               | <b>C5b</b>      | 119.20                | 117.66        |
|                 |                  |                     |               | <b>C1b</b>      | 112.92                | 118.16        |
| <b>C2a, C3a</b> | 135.2            |                     | 135.18        | <b>C2a, C3a</b> |                       | 134.62        |
| <b>C3b, C5b</b> |                  | 128.58              | 128.50        | <b>C6b</b>      | 130.29                | 130.39        |
| <b>C2b, C6b</b> |                  | 129.29              | 129.3         |                 |                       |               |
| <b>C4b</b>      |                  | 132.87              | 132.57        |                 |                       |               |
| <b>C1b</b>      |                  | 130.79              | 131.6         |                 |                       |               |
| <b>C1a</b>      | 121.8            |                     | 121.52        |                 |                       | 119.88        |
|                 |                  |                     |               | <b>C4b</b>      | 135.68                | 133.06        |
| <b>C7b</b>      |                  | 167.35              | 167.76        | <b>C2b</b>      | 161.17                | 161.90        |
|                 |                  |                     |               | <b>C7b</b>      | 171.97                | 173.50        |

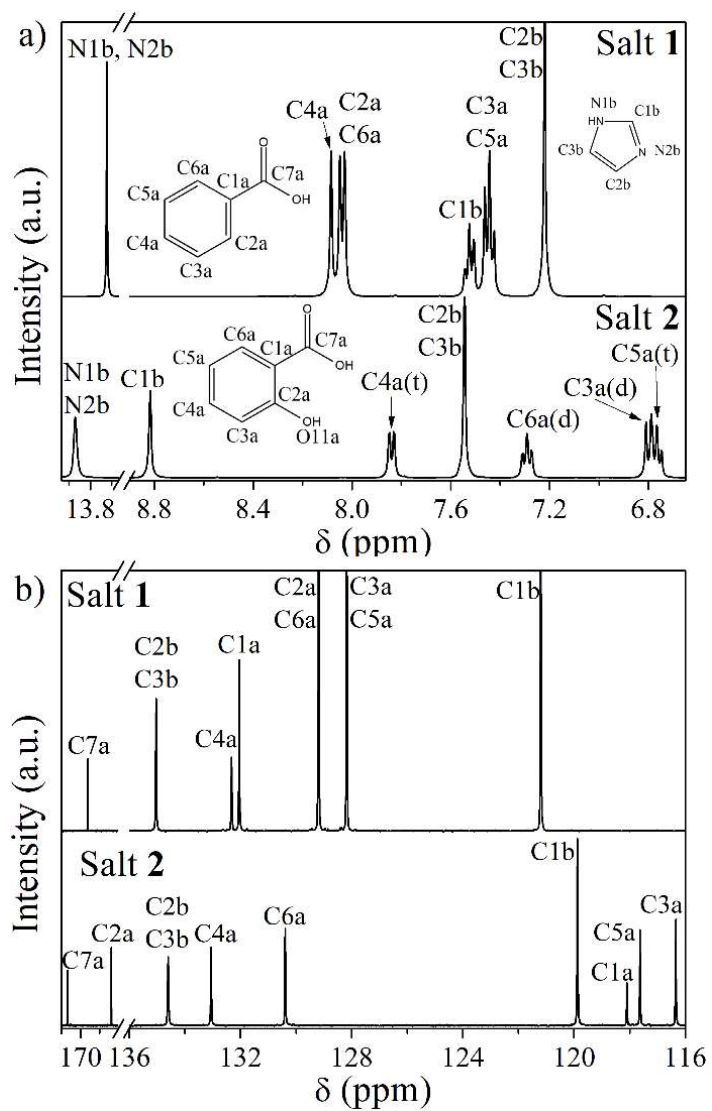

**Figure S5.**  $^1\text{H}$  NMR (a) and  $^{13}\text{C}$  NMR (b) solution (DMSO- $d_6$ ) spectra of salt **1** and **2**.



**Table S4.** The geometrical parameters: bond length [Å] and bond angles [°] of imidazolium ion of salt **1** and **2**.

|                     | Salt <b>1</b> | Salt <b>2</b> |
|---------------------|---------------|---------------|
| <b>Bond Lengths</b> |               |               |
| N1–C1               | 1.325         | 1.323         |
| N2–C1               | 1.327         | 1.327         |
| N1–C3               | 1.368         | 1.366         |
| N2–C2               | 1.366         | 1.361         |
| C2–C3               | 1.349         | 1.340         |
| <b>Bond Angles</b>  |               |               |
| N1-C1-N2            | 108.9         | 108.4         |
| C1-N1-C3            | 108.1         | 108.6         |
| C1-N2-C2            | 108.6         | 108.5         |
| N1-C3-C2            | 107.6         | 107.1         |
| N2-C2-C3            | 106.8         | 107.4         |

<sup>b</sup>Angles and bond lengths are defined in Fig. 1.

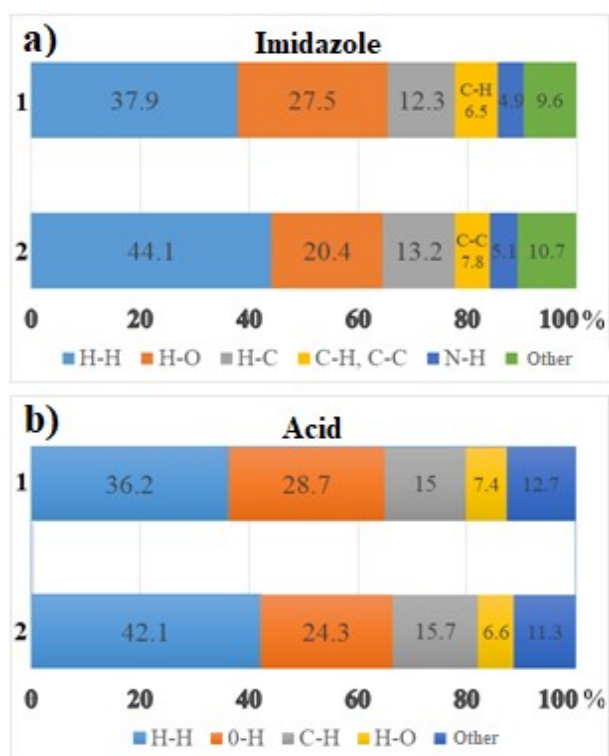

**Figure S6.** Close contact of imidazolium benzoate salt (1), imidazolium salicylate (2); Hirshfeld surface calculated for imidazole molecules (a) and acid molecules (b). The notation A-B refers to the interaction between A atoms inside the Hirshfeld surface and B atoms outside.

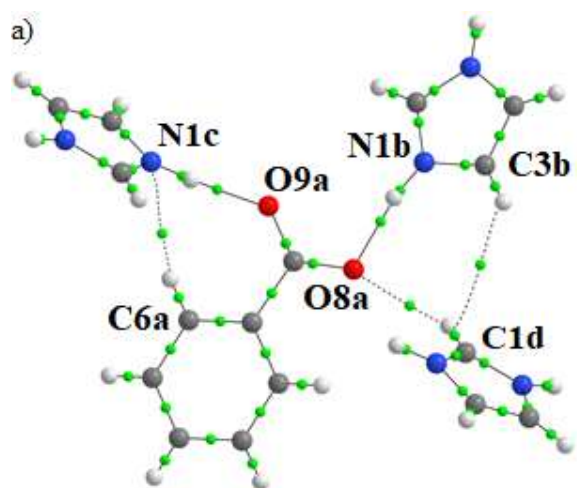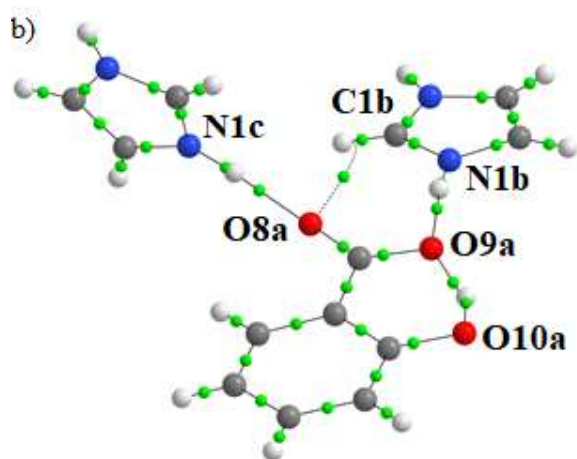

**Figure S7.** Molecular graphs (QTAIM) of salt 1 (a) and salt 2 (b) bound through hydrogen bonds. Green circles correspond to bond critical points (BCP).

**Table S5.** Geometrical parameters of D–H···A hydrogen bonds (in Å and °) and QTAIM parameters (in atomic units) corresponding to the bond critical point (BCP).

| D–H···A  | $d_{\text{H}\cdots\text{A}}$<br>[Å] | $\angle\text{D–H}\cdots\text{A}$<br>[°] | $D_{\text{D–H}}$<br>[Å] | $D_{\text{D}\cdots\text{A}}$<br>[Å] | $\rho_{\text{BCP}}$ [a.u.] | $\Delta\rho_{\text{BCP}}$<br>[a.u.] | $G_{\text{BCP}}$<br>[a.u.] | $V_{\text{BCP}}$<br>[a.u.] | $H_{\text{BCP}}$ [a.u.] |          |
|----------|-------------------------------------|-----------------------------------------|-------------------------|-------------------------------------|----------------------------|-------------------------------------|----------------------------|----------------------------|-------------------------|----------|
|          | C6b–H···N1c                         | 2.802                                   | 131.9                   | 0.950                               | 3.509                      | 0.0057                              | 0.0220                     | 0.0044                     | -0.0033                 | 0.00111  |
|          | N1c–H···O9b                         | 1.729                                   | 174.6                   | 0.922                               | 2.649                      | 0.0333                              | 0.2121                     | 0.0527                     | -0.0524                 | 0.00033  |
| <b>1</b> | C1d–H···O8b                         | 2.380                                   | 144.7                   | 0.950                               | 3.203                      | 0.0096                              | 0.0447                     | 0.0102                     | -0.0091                 | 0.00102  |
|          | N1a–H···O8b                         | 1.671                                   | 168.4                   | 0.944                               | 2.603                      | 0.0378                              | 0.2564                     | 0.0638                     | -0.0635                 | 0.00029  |
|          | C1d–H···H                           | 2.751                                   | 109.1                   | 0.950                               | 3.190                      | 0.0019                              | 0.0075                     | 0.0012                     | -0.0006                 | 0.00065  |
|          | N1c–H···O8b                         | 1.766                                   | 166.1                   | 0.932                               | 2.679                      | 0.0363                              | 0.1476                     | 0.0362                     | -0.0356                 | 0.00068  |
| <b>2</b> | O10b–H···O9b                        | 1.624                                   | 155.5                   | 0.959                               | 2.528                      | 0.0536                              | 0.1882                     | 0.0539                     | -0.0608                 | -0.00689 |
|          | C1a–H···O8b                         | 2.840                                   | 110.4                   | 0.950                               | 3.294                      | 0.0052                              | 0.0234                     | 0.0047                     | -0.0035                 | 0.00116  |
|          | N1a–H···O9b                         | 1.771                                   | 172.6                   | 0.929                               | 2.695                      | 0.0372                              | 0.1448                     | 0.0363                     | -0.0363                 | -0.00006 |
